# Supplementary material for: RBUD: A New Functional Potential Analysis Approach for Whole Microbial Genome Shotgun Sequencing
Source: MDPI journal article supplement (doi:10.3390/microorganisms8101563), 2020-10-10
Supplement: s1 [file s1]

Supplementary Figures

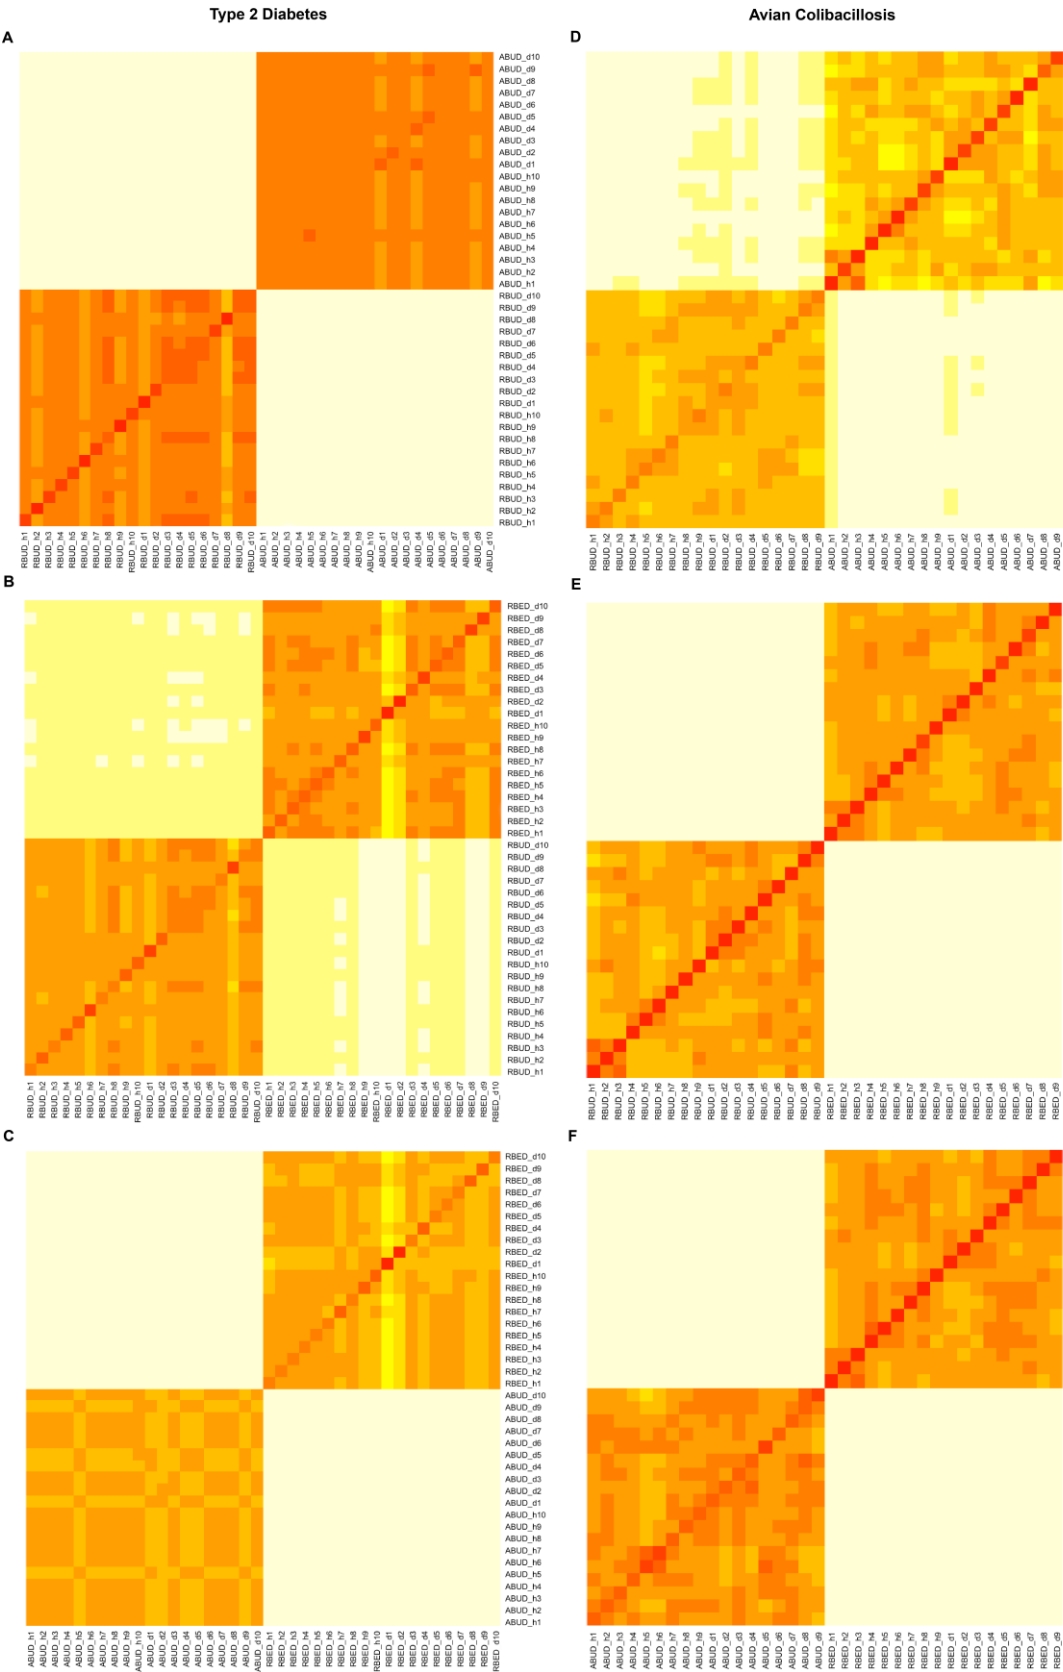

**Supplementary Figure 1.** Comparison of the similarity between the two in three methods using Jaccard Coefficient similarity matrix correlation analysis in avian colibacillosis and T2D. **(A)** Species similarity between RBUD method and ABUD method in T2D. **(B)** Species similarity between RBUD method and RBED method in T2D. **(C)** Species similarity between ABUD method and RBED method in T2D. **(D)** Species similarity between RBUD method and ABUD method in avian colibacillosis. **(E)** Species similarity between RBUD method and RBED method in avian colibacillosis. **(F)** Species similarity between ABUD method and RBED method in avian colibacillosis.

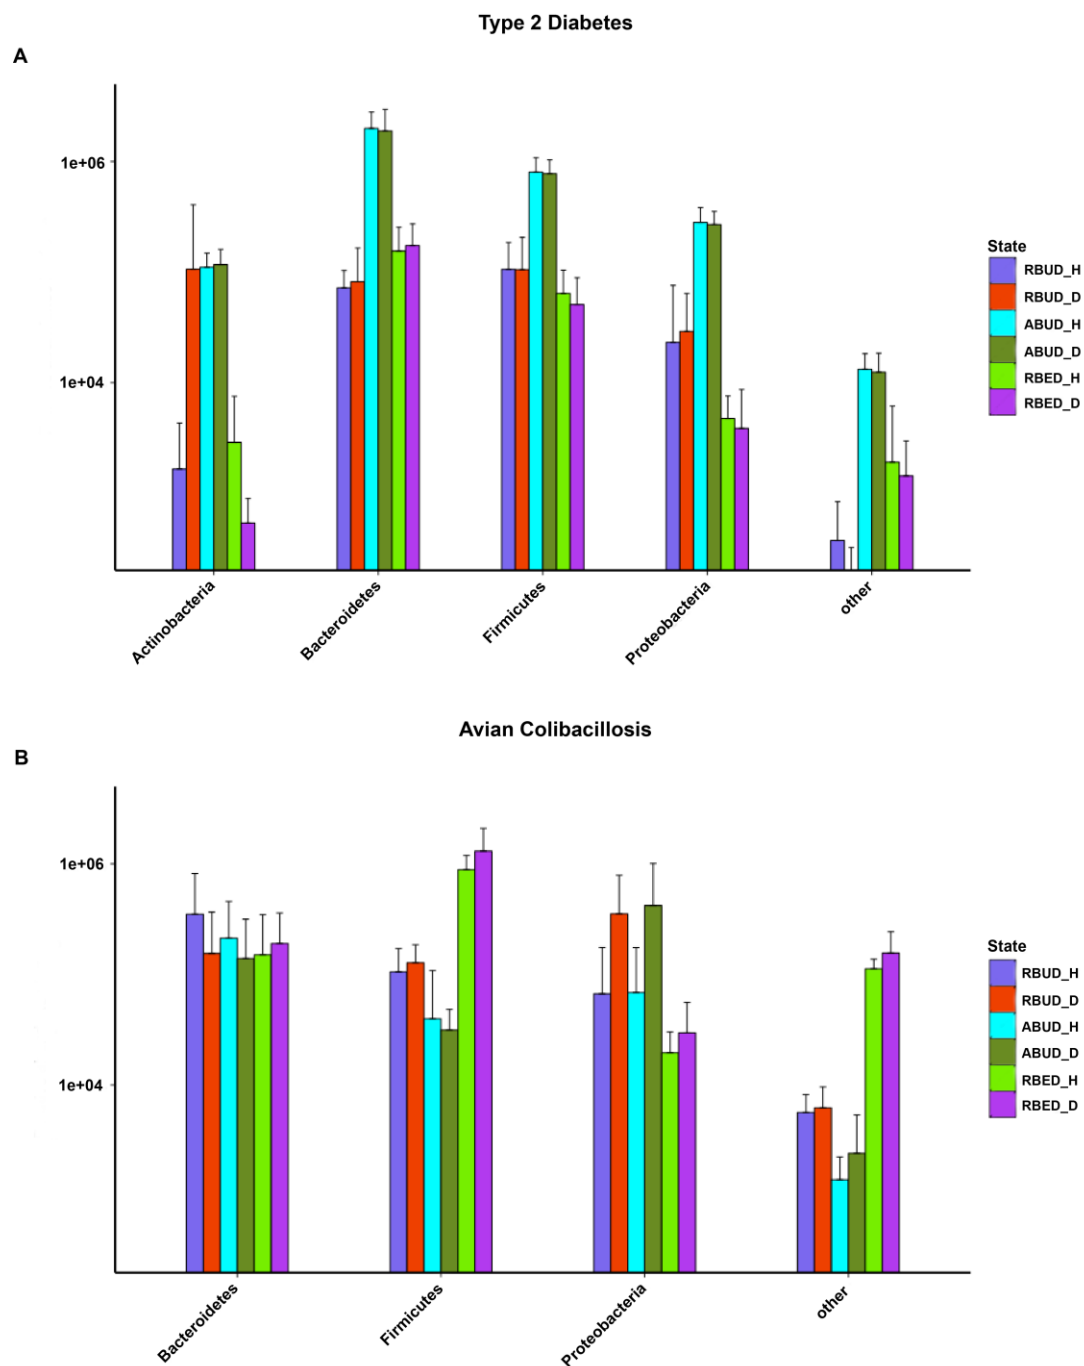

**Supplementary Figure 2.** Relative abundance of log10 at the phylum level in T2D and avian colibacillosis. **(A)** The alterations of relative abundance for dominant phylum between healthy controls and disease cases in T2D. **(B)** The abundance change of dominant phylum between healthy group and disease group in avian colibacillosis.

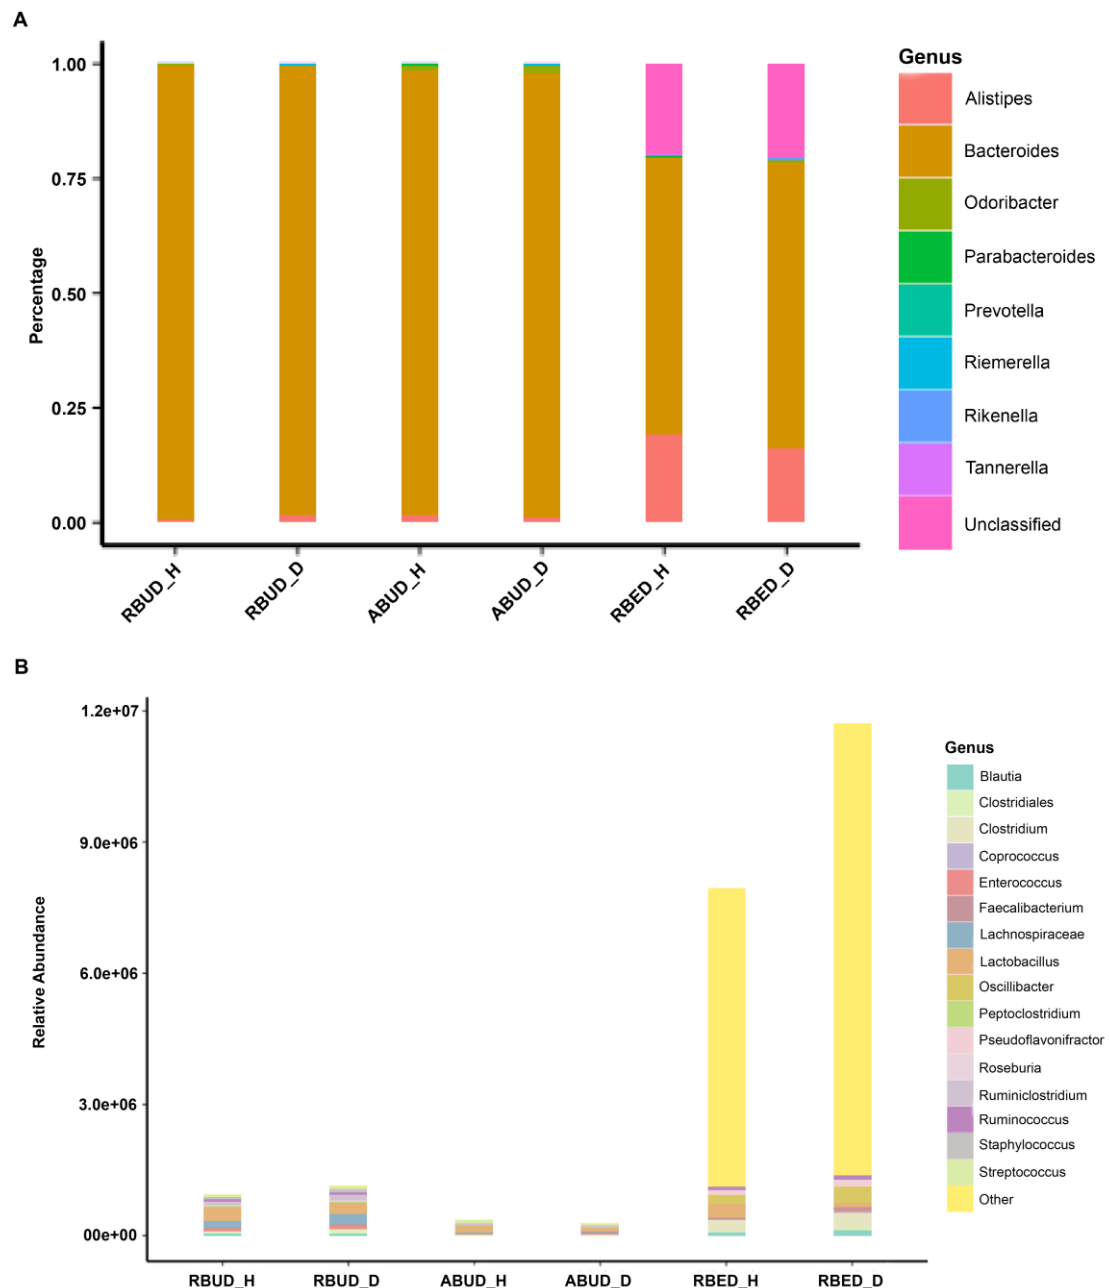

**Supplementary Figure 3.** The abundance alterations of Bacteroidetes and Firmicutes in avian colibacillosis. **(A)** The percentage change of Bacteroidetes. **(B)** The relative abundance alteration of Firmicutes.
